# Supplementary material
Source: PubMed Central journal article supplement (PMC3409750)
Supplement: 1204533109_pnas.201204533SI.pdf [file 1204533109_pnas.201204533SI.pdf]

# Supporting Information

Kovacs et al. 10.1073/pnas.1204533109

## SI Materials and Methods

**Production of HIV-1 Envelope Proteins, CD4, and Antibodies.** The expression constructs of 92UG037.8 and CZA97012 gp140 trimers were described previously (1, 2). The codon-optimized synthetic genes of the full-length gp120s with a C-terminal His-tag were produced by GeneArt. The 293T cell lines stably transfected with these envelope constructs were generated by Codex Biosolutions. The stable cell lines were grown in DMEM with 10% FBS to confluence and then were changed to Freestyle 293 expression medium (Invitrogen). The cell supernatants were harvested at 96–108 h after medium change. The His-tagged gp120 and gp140 proteins were purified by Ni-NTA (Qiagen) followed by gel-filtration chromatography as described (1). Briefly, after a clarifying spin and the addition of imidazole to the final concentration of 15 mM, the cell supernatant was loaded onto a nickel column at a flow rate of 0.8 mL/min and was washed with 20 mM imidazole in PBS followed by further washing with 40 mM imidazole in PBS. The protein then was eluted with 300 mM imidazole in PBS. The fractions containing the purified protein were pooled, concentrated, and further purified by gel-filtration chromatography on Superose 6 (GE Healthcare) for gp140 trimers and Superdex 200 (GE Healthcare) for gp120s in a column running buffer containing 25 mM Tris (pH 7.5) and 150 mM NaCl. The purified proteins were concentrated, frozen in liquid nitrogen, and stored at  $-80^{\circ}\text{C}$ . Soluble two-domain and four-domain CD4 were produced as described (3). The VRC01 expression construct was kindly provided by John Mascola (Vaccine Research Center, National Institutes of Health, Bethesda, MD); the CHO stable line expressing antibody b6 was provided by Dennis Burton (Scripps); the 17b hybridoma was provided by James Robinson (Tulane University, New Orleans, LA); and A244 gp120 gD (+) was provided by Larry Liao and Barton Haynes (Duke University, Winston Salem, NC). Antibodies PG9, PG16, and 2G12 used in the pilot experiments were kindly provided by Dennis Burton and Ian Wilson (The Scripps Research Institute). Subsequently, we generated expression constructs of these antibodies, as well as PGT123, CH31, 2F5, and 4E10, using synthetic genes made by GeneArt. The intact antibodies or Fab fragments then were expressed in 293T cells either by transient transfection or using selected stably transfected clones and were purified by affinity chromatography using Gammabind-Plus resin (GE Healthcare) followed by gel-filtration chromatography. Fab preparations by papain digestion were carried out as described (3).

**Surface Plasmon Resonance Binding Assays.** All experiments were performed in duplicate with a Biacore 3000 instrument (Biacore, Inc.) at  $20^{\circ}\text{C}$  in HBS-EP running buffer [10 mM Hepes (pH 7.4), 150 mM NaCl, 3 mM EDTA, 0.005% P20], with immobilization levels of 250–600 response units (RU) to avoid rebinding events. Immobilization of CD4, protein A (Sigma), or human Fab binder (Biacore) to CM5 chips was performed following the standard amine coupling procedure as recommended by the manufacturer. For kinetic measurements, sensorgrams were recorded by passing various concentrations of an analyte over the immobilized ligand surface at a flow rate of 50  $\mu\text{L}/\text{min}$  with a 2-min association phase followed by a 10-min dissociation phase. The surface was regenerated between each experiment with two consecutive injections (1 min) of 10 mM glycine-HCl (pH 2.1) at 50  $\mu\text{L}/\text{min}$  followed by a 5-min equilibration phase in the HBS-EP buffer before the subsequent experiment. Identical injections over blank surfaces were subtracted from the data for kinetic analysis. Binding kinetics

were analyzed by BiaEvaluation software (Biacore) using a 1:1 Langmuir binding model. All injections were carried out in duplicate and gave essentially identical results.

**Multiangle Light Scattering.** Purified envelope proteins or their complexes with four-domain CD4, or with VRC01 Fab, or with CD4 and 17b Fab were resolved on a Superdex 200 size-exclusion column (GE Healthcare) in a running buffer containing 25 mM Tris (pH 7.5) and 150 mM NaCl. The gel-filtration chromatography was coupled to a Wyatt miniDAWN TREOS three-angle light-scattering detector and an Optilab-rEX refractive index detector (Wyatt Technology). The recorded scattering data were evaluated using ASTRA 5.3.4 software.

**Analytical Ultracentrifugation.** Analytical ultracentrifugation was performed on a Beckman-Coulter ProteomeLab XL-A analytical ultracentrifuge as described previously (4). Briefly, experiments were carried out at  $4^{\circ}\text{C}$  in a buffer containing 25 mM Tris (pH 7.5) and 150 mM NaCl with three protein concentrations of 0.25, 0.50, and 0.75 absorbance units at 280 nm, respectively. Three rotor speeds (5,000, 7,000, and 9,000 rpm) were used for the gp140s and their complexes, and three higher speeds (7,000, 10,000, and 13,000 rpm) were used for the gp120s with Beckman An-60 Ti rotor. Equilibrium was reached in 30 h. Data were fitted to a single-species model using the XL-A software package. The carbohydrate contents of the gp120s and gp140s were estimated to be  $\sim 43\%$  and  $\sim 55\%$ , respectively, based on their amino acid sequences and SDS/PAGE analysis. The average partial specific volumes of a *N*-linked oligosaccharide and the polypeptide chains of the envelope proteins were calculated to be 0.64 and 0.73 mL/g, respectively, according to the methods reported previously (5, 6). Thus, the calculated partial specific volume is 0.6769 mL/g for the gp120s and 0.6874 mL/g for the gp140s. For the complexes of gp140 and CD4 binding site ligands, the partial specific volumes varied only slightly when all possible stoichiometries for a given complex were considered and had very little impact on the determined molecular masses. For example, the partial specific volume of the 92UG037.8 gp140-CD4 complex is 0.6918 mL/g for the assumed stoichiometry of 1:1, 0.6955 mL/g for the stoichiometry of 1:2, and 0.6976 mL/g for the stoichiometry of 1:3; and the corresponding molecular mass is  $456 \pm 5$  kDa,  $458 \pm 4$  kDa, and  $461 \pm 3$  kDa, respectively, all values that are consistent with a stoichiometry of 1:1. The partial specific-volume values used in the Table S1 are 0.6918 mL/g for the gp140-CD4 complex; 0.6981 mL/g for the gp140-VRC01 Fab complex; and 0.6955 mL/g for the gp140-CD4-17b Fab complex.

**Animals and Immunizations.** Outbred female Hartley guinea pigs (Elm Hill Labs) were housed at the Animal Research Facility of Beth Israel Deaconess Medical Center under protocols approved by the Institutional Animal Care and Use Committee. Guinea pigs were immunized by bilateral i.m. injections in the upper quadriceps of gp140s or gp120s (100  $\mu\text{g}/\text{animal}$ ) at 4-wk intervals (weeks 0, 4, and 8) using 500  $\mu\text{L}$  of a dual adjuvant combination comprising 15% (vol/vol) oil-in-water Emulsigen (MVP Laboratories)/PBS and 50  $\mu\text{g}$  of immunostimulatory di-nucleotide CpG DNA (5'-TCGTCGTTGTCGTTTTGTCGTT-3') (Midland Reagent Company). Serum samples were obtained from the vena cava of anesthetized animals after each immunization.

**ELISA.** Serum-binding antibody titers against gp140 trimers and gp120 monomers were determined by endpoint ELISAs as previously described (2). Ninety-six-well Maxisorp ELISA plates

(Thermo Fisher Scientific) coated overnight with 100  $\mu$ L per well of 92UG037.8 gp140, C97ZA012 gp140, 92UG037.8 gp120, or C97ZA012 gp120 at a concentration of 1  $\mu$ g/mL in PBS were blocked for 3 h with PBS containing 2% BSA (Sigma) and 0.05% Tween 20 (Sigma). Then guinea pig sera were added in serial dilutions and incubated for 1 h at room temperature. The plates were washed three times with PBS containing 0.05% Tween 20 and were incubated for 1 h with a 1/2,000 dilution of an HRP-conjugated goat anti-guinea pig secondary antibody (Jackson ImmunoResearch Laboratories). The plates were washed three times and developed with SureBlue tetramethylbenzidine microwell peroxidase (KPL Research Products), stopped by the addition of stop solution (KPL Research Products), and analyzed at 450 nm/550 nm on a Spectramax Plus ELISA plate reader (Molecular Devices) using Softmax Pro-4.7.1 software. ELISA endpoint titers were defined as the highest reciprocal serum dilution that yielded absorbance greater than twofold background.

**Neutralizing Antibody Assay in TZM.bl Cells.** Neutralizing antibody responses against HIV-1 Env pseudoviruses were measured using

luciferase-based virus neutralization assays in TZM.bl cells as previously described (2, 7, 8). These assays measure the reduction in luciferase reporter gene expression in TZM-bl cells following a single round of virus infection. The ID<sub>50</sub> was calculated as the serum dilution that resulted in a 50% reduction in relative luminescence units compared with the virus control wells after the subtraction of cell control relative luminescence units. Briefly, threefold serial dilutions of serum samples were performed in duplicate (96-well flat-bottomed plate) in 10% DMEM growth medium (100  $\mu$ L per well). Virus was added to each well in a volume of 50  $\mu$ L, and the plates were incubated for 1 h at 37 °C. Then TZM.bl cells were added ( $1 \times 10^4$  per well in 100  $\mu$ L volume) in 10% DMEM growth medium containing diethylaminoethyl-dextran (Sigma) at a final concentration of 11  $\mu$ g/mL. Murine leukemia virus (MuLV) negative controls were included in all assays. HIV-1 Env pseudoviruses, including clade A (DJ263.8), clade B (SF162.LS and BaL.26), and clade C (MW965.26, TV1.21, ZM109F.PB4, ZM197M.PB7, ZM233M.PB6, and Du422.1) isolates, were prepared as previously described (7).

1. Frey G, et al. (2008) A fusion-intermediate state of HIV-1 gp41 targeted by broadly neutralizing antibodies. *Proc Natl Acad Sci USA* 105:3739–3744.
2. Nkolola JP, et al. (2010) Breadth of neutralizing antibodies elicited by stable, homogeneous clade A and clade C HIV-1 gp140 envelope trimers in guinea pigs. *J Virol* 84:3270–3279.
3. Freeman MM, et al. (2010) Crystal structure of HIV-1 primary receptor CD4 in complex with a potent antiviral antibody. *Structure* 18:1632–1641.
4. Chen B, et al. (2000) Expression, purification, and characterization of gp160e, the soluble, trimeric ectodomain of the simian immunodeficiency virus envelope glycoprotein, gp160. *J Biol Chem* 275:34946–34953.
5. Lewis MS, Junghans RP (2000) Ultracentrifugal analysis of molecular mass of glycoproteins of unknown or ill-defined carbohydrate composition. *Methods Enzymol* 321:136–149.
6. Laue TM, Shah BD, Ridgeway TM, Pelletier SL (1992) Computer-aided interpretation of analytical sedimentation data for proteins. *Analytical Ultracentrifugation in Biochemistry and Polymer Science*, ed Harding SE (Royal Society of Chemistry, Cambridge, UK), pp 90–125.
7. Li M, et al. (2005) Human immunodeficiency virus type 1 env clones from acute and early subtype B infections for standardized assessments of vaccine-elicited neutralizing antibodies. *J Virol* 79:10108–10125.
8. Mascola JR, et al. (2005) Recommendations for the design and use of standard virus panels to assess neutralizing antibody responses elicited by candidate human immunodeficiency virus type 1 vaccines. *J Virol* 79:10103–10107.

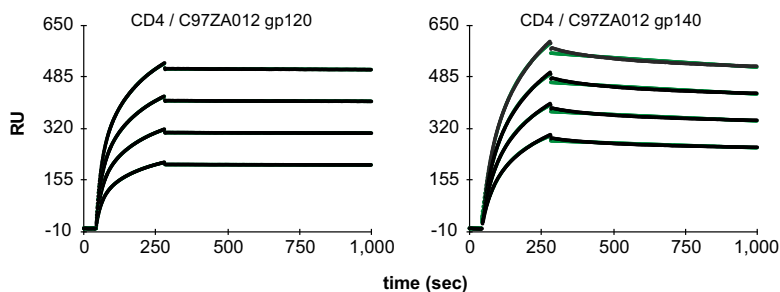

**Fig. S1.** Binding of soluble CD4 to C97ZA012 gp120 and gp140. Soluble four-domain CD4 was immobilized on a CM-5 chip, and various concentrations (50–1,000 nM) of C97ZA012 gp120 or C97ZA012 gp140 were passed over the chip surface. Binding kinetics was evaluated using a 1:1 Langmuir binding model; binding constants are summarized in Table S2. The sensorgrams are shown in black and the fits in green. All injections were carried out in duplicate and gave essentially identical results. Only one of the duplicates is shown.

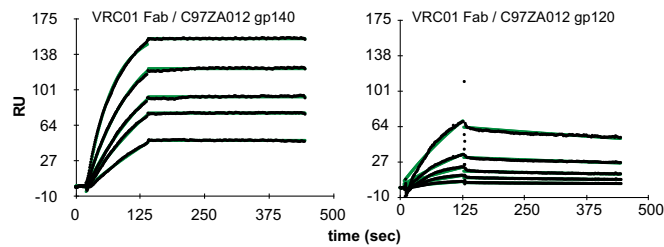

**Fig. S2.** Interaction of CD4 binding site antibody VRC01 with C97ZA012 gp140 and gp120. Fab of the CD4 binding site antibody VRC01 was captured on a surface immobilized with human Fab binder, and various concentrations (50–1,000 nM) of C97ZA012 gp120 or C97ZA012 gp140 were flowed over the chip surface.

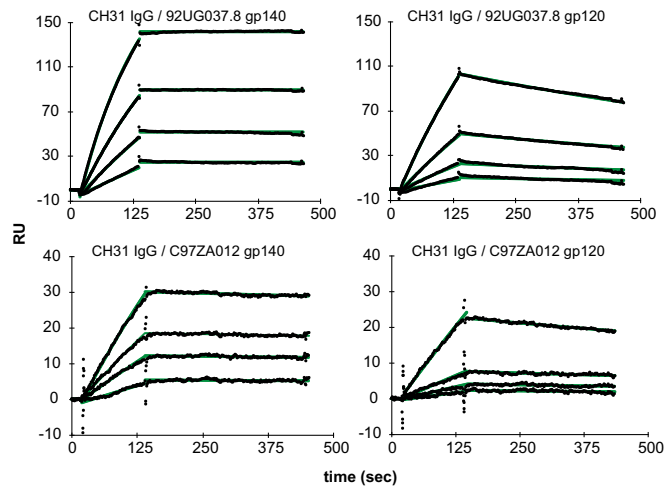

**Fig. S3.** Binding of CD4 binding site antibody CH31 with gp140 and gp120. CD4 binding site antibody CH31 was captured onto a surface immobilized with protein A, and various concentrations (50–1,000 nM) of gp120 or gp140 were flowed over the chip surface.

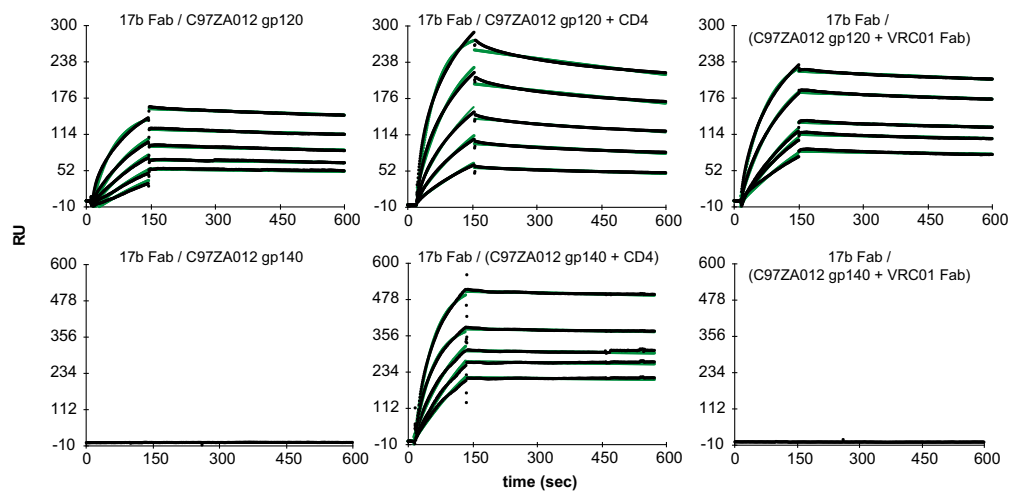

**Fig. S4.** Interactions of C97ZA012 gp140 and gp120 with CD4-induced antibody 17b. Fab of the CD4-induced antibody 17b was immobilized to a sensor chip surface using human Fab binder. Various concentrations (50–1,000 nM) of C97ZA012 gp120 and C97ZA012 gp140, purified C97ZA012 gp120-CD4 and C97ZA012 gp140-CD4 complexes, or purified C97ZA012 gp120-VRC01 Fab and C97ZA012 gp140-VRC01 Fab complexes were passed over the 17b surface.

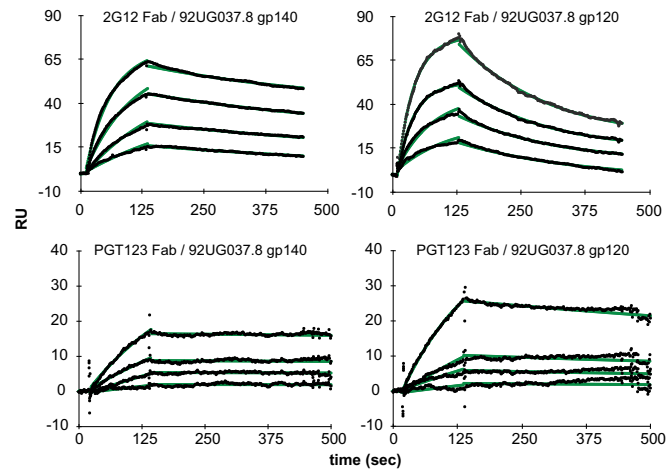

**Fig. S5.** Interactions of gp140 and gp120 with broadly neutralizing antibodies targeting the glycan-dependent epitopes. Fab of broadly neutralizing antibody 2G12 or PGT 123 was immobilized on a chip surface using human Fab binder. Then various concentrations (50–1,000 nM) of 92UG037.8 gp120 or 92UG037.8 gp140 were passed over the antibody surface. Binding kinetics was evaluated using a 1:1 Langmuir binding model; binding constants are summarized in Table S2. The sensorgrams are in black and the fits in green. All injections were carried out in duplicate and gave essentially identical results. Only one of the duplicates is shown.

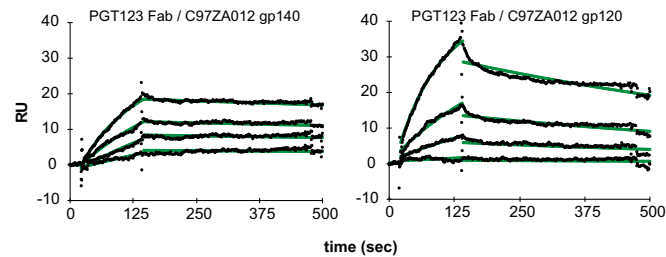

**Fig. S6.** Binding of PGT123 with C97ZA012 gp140 and gp120. Fab of broadly neutralizing antibody PGT 123 was immobilized on a chip surface using human Fab binder. Then various concentrations (50–1,000 nM) of C97ZA012 gp120 or C97ZA012 gp140 were passed over the antibody surface.

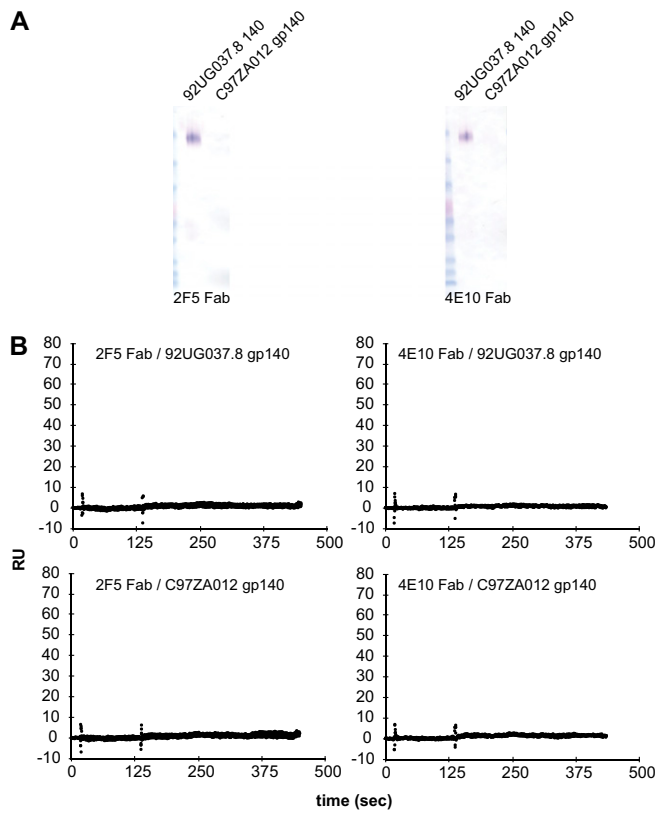

Fig. 57. There is no binding between native gp140s and anti-MPER antibodies. (A) 2F5 and 4E10 Fabs react on an immunoblot with 92UG037.8 gp140 but not with C97ZA012 gp140, because the C97ZA012 isolate is very resistant to both 2F5 and 4E10 (Table S3). (B) Fab of 2F5 or 4E10 was immobilized on the chip surface using human Fab binder. Then various concentrations (50–1,000 nM) of 92UG037.8 gp140 or C97ZA012 gp140 were passed over the antibody surface.

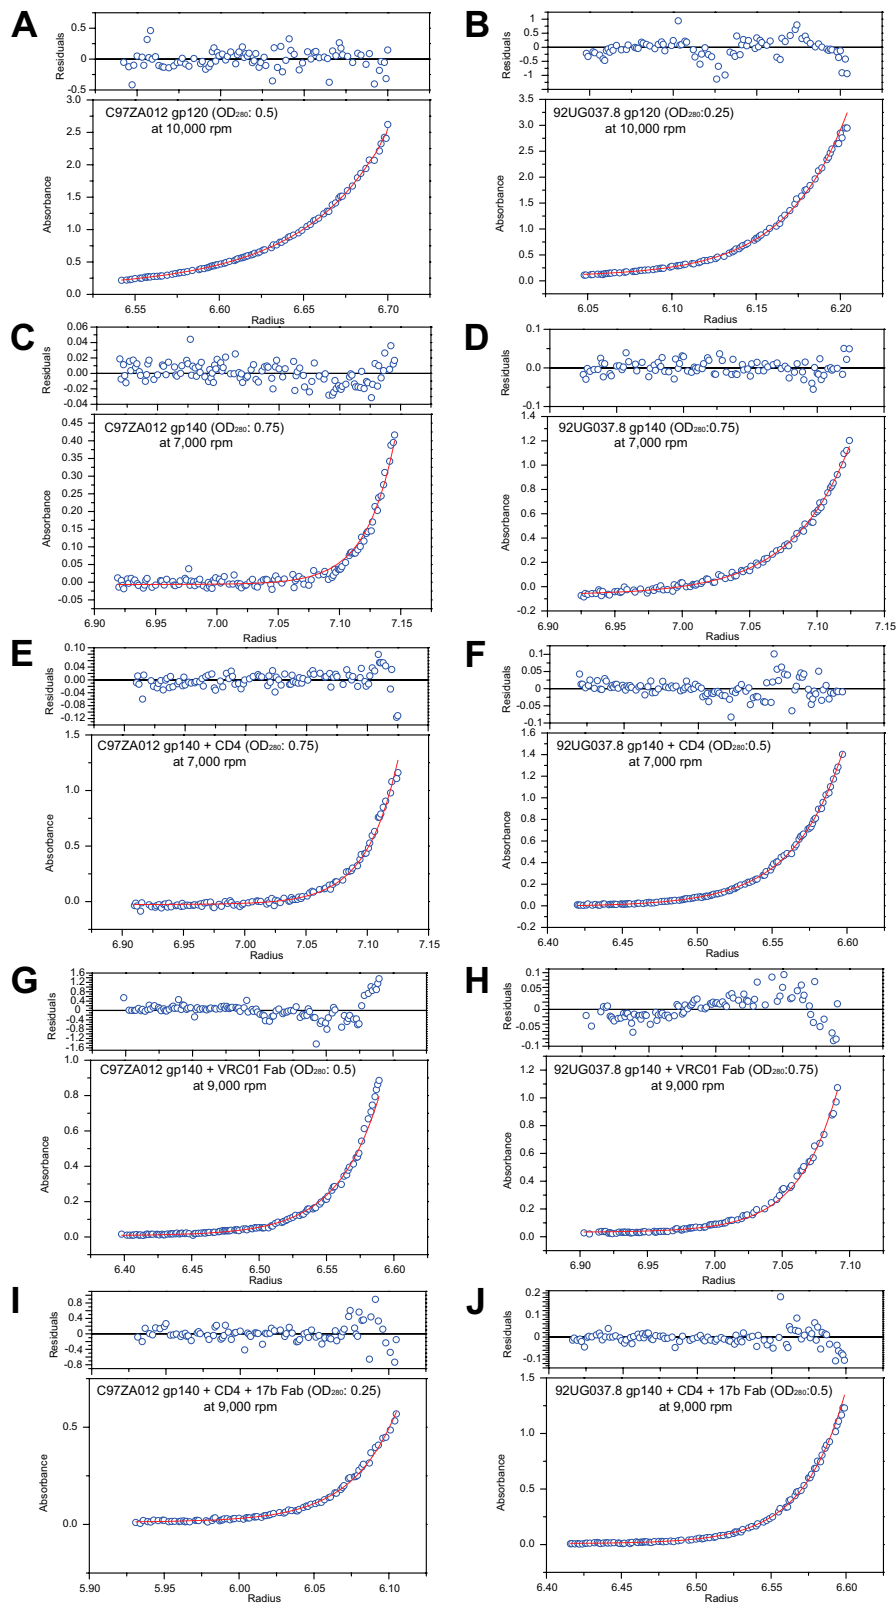

**Fig. S8.** Analytical ultracentrifugation analysis of envelope proteins and their complexes with CD4 binding site ligands. Analytical ultracentrifugation was performed with three protein concentrations and three rotor speeds for each protein or protein complex as described in *SI Materials and Methods*. The data shown for each sample were collected at the protein concentration and rotor speed indicated. All data sets were fitted to a single-species model. The partial specific volumes of the envelope glycoproteins and their complexes were calculated as described in *SI Materials and Methods*. The determined molecular masses are summarized in Table S1.

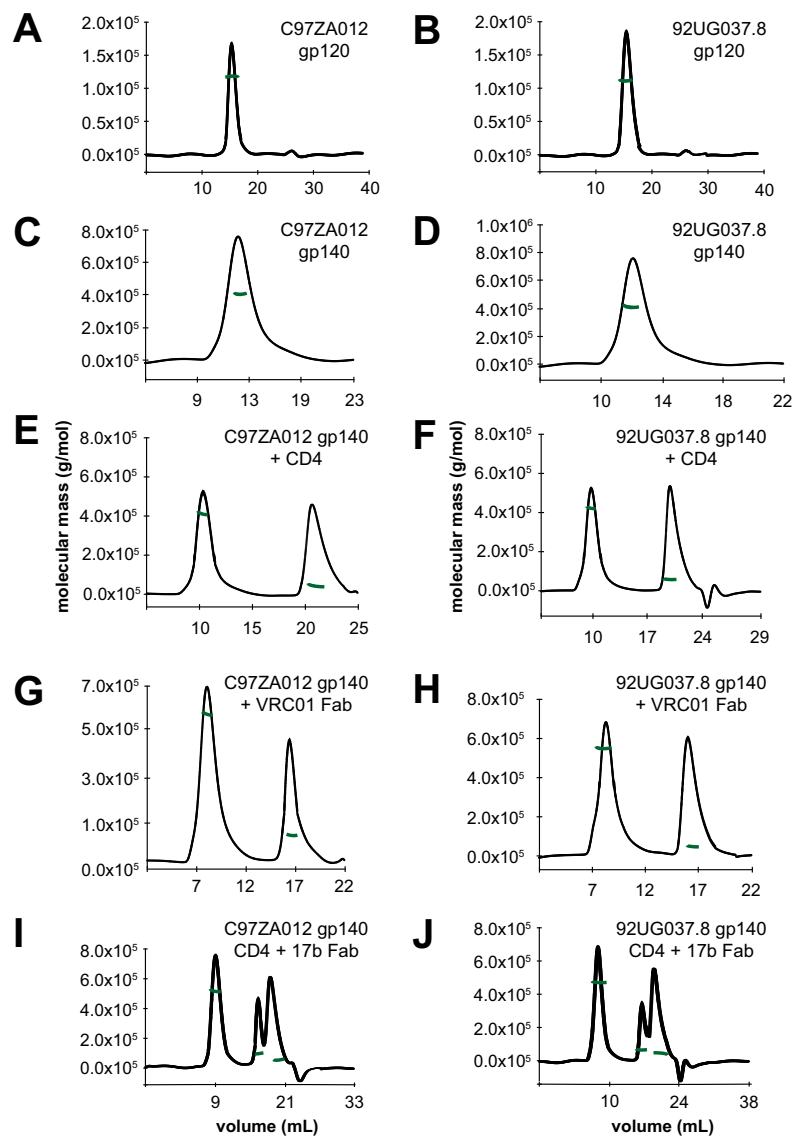

**Fig. S9.** Multiangle light-scattering analysis of envelope proteins and their complexes with CD4 binding site ligands. Purified 92UG037.8 and C97ZA012 envelope proteins and their complexes with CD4, VRC01 Fab, or CD4 and 17b were resolved on a Superdex 200 column, coupled to a Wyatt miniDAWN TREOS three-angle light-scattering detector and Optilab-rEX refractive index detector. The scattering data were evaluated using ASTRA 5.3.4 software. The determined molecular masses are summarized in Table S1.

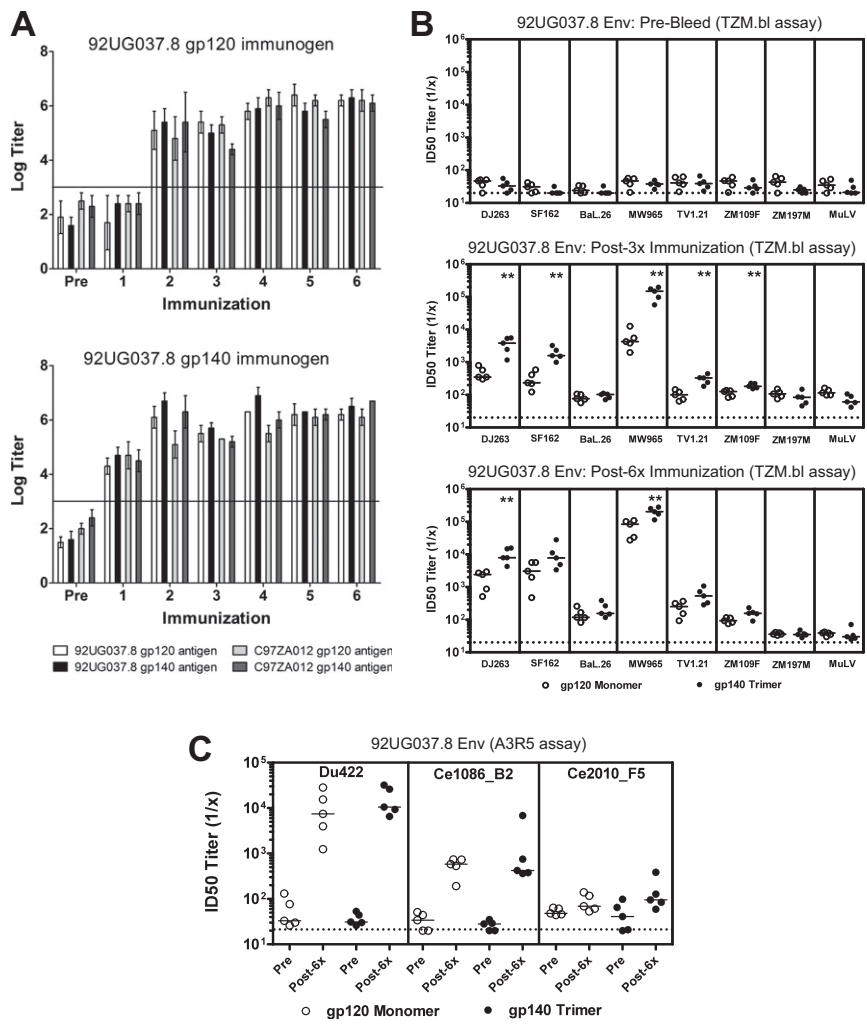

**Fig. 510.** Immunogenicity of the 92UG037.8 trimeric gp140 and monomeric gp120 in guinea pigs. (A) Sera of guinea pigs vaccinated with either 92UG037.8 gp120 or gp140 obtained prevaccination (Pre) and 4 wk after each immunization were tested in endpoint ELISAs against all 92UG037.8 and C97ZA012 antigens as indicated. Binding antibody responses against 92UG037.8 gp120 monomer (white columns), 92UG037.8 gp140 trimer (black columns), C97ZA012 gp120 monomer (light gray columns), and C97ZA012 gp140 trimer (dark gray columns) are presented as geometric mean titers at each time point  $\pm$  SD. Horizontal lines indicate background threshold. (B) Guinea pig sera obtained prevaccination (Pre-Bleed), 4 wk after the third vaccination (Post-3x) and 4 wk after the sixth vaccination (Post-6x) were tested against a multiclade panel of tier 1 neutralization-sensitive isolates including clade A (DJ263.8), clade B (SF162.LS and Bal.26), and clade C (MW965.26, TV1.21, ZM109F, and ZM197M) HIV-1 Env pseudoviruses and MuLV (negative control) in T.ZM.bl neutralization assays. Neutralizing antibody titers induced by 92UG037.8 gp120 and gp140 are shown by graphical representation. \* $P < 0.05$ ; \*\* $P < 0.01$ ; unpaired two-tailed  $t$  test. Horizontal bars indicate median titers. (C) Sera obtained prevaccination (Pre) and 4 wk after the sixth vaccination (Post-6x) were tested against three tier 2 clade C isolates—Du422, Ce1086\_B2, and Ce2010\_F5 IMC viruses—in A3R5 neutralization assays. Neutralizing antibody titers induced by 92UG037.8 gp120 and gp140 are shown by graphical representation.



## 92UG037.8 gp120 & gp140 TZM.bl Titers

| Timepoint | Tier 1A<br>DJ263.8 |        | Tier 1B<br>SF162.LS |        | Tier 1B<br>BaL.26 |       | Tier 1C<br>MW965.26 |         | Tier 1C<br>TV1.21 |       | Tier 1C<br>ZM109F.PB4 |       | Tier 1C<br>ZM197M.PB7 |       | MuLV  |       |
|-----------|--------------------|--------|---------------------|--------|-------------------|-------|---------------------|---------|-------------------|-------|-----------------------|-------|-----------------------|-------|-------|-------|
|           | gp120              | gp140  | gp120               | gp140  | gp120             | gp140 | gp120               | gp140   | gp120             | gp140 | gp120                 | gp140 | gp120                 | gp140 | gp120 | gp140 |
| Pre       | 51                 | 33     | 31                  | <20    | 24                | <20   | 47                  | 38      | 41                | 31    | 48                    | 27    | 43                    | 25    | 35    | 20    |
| Post-3rd  | 573                | 2,464  | 233                 | 1,524  | 106               | 71    | 12,639              | 149,926 | 123               | 240   | 138                   | 165   | 151                   | 57    | 161   | 58    |
| Post-6th  | 873                | 7,893  | 3,079               | 4,885  | 118               | 117   | 33,508              | 172,988 | 153               | 720   | 83                    | 152   | 40                    | 34    | 35    | 33    |
| Pre       | 51                 | 25     | 42                  | <20    | 34                | <20   | 55                  | 36      | 61                | 39    | 47                    | 29    | 65                    | 31    | 47    | 21    |
| Post-3rd  | 795                | 5,364  | 222                 | 3,248  | 102               | 112   | 5,523               | 175,523 | 145               | 445   | 133                   | 221   | 119                   | 149   | 139   | 107   |
| Post-6th  | 2,941              | 14,854 | 5,661               | 28,075 | 259               | 388   | 83,821              | 280,286 | 366               | 1,079 | 113                   | 231   | 33                    | 37    | 42    | 30    |
| Pre       | 47                 | <20    | 36                  | <20    | 33                | <20   | 57                  | 26      | 63                | 23    | 61                    | <20   | 56                    | <20   | 53    | <20   |
| Post-3rd  | 350                | 1,170  | 411                 | 998    | 74                | 103   | 3,841               | 57,247  | 64                | 183   | 90                    | 154   | 75                    | 84    | 98    | 90    |
| Post-6th  | 2,698              | 4,289  | 1,981               | 3,368  | 115               | 149   | 109,024             | 113,956 | 316               | 286   | 116                   | 91    | 36                    | 28    | 39    | 27    |
| Pre       | 35                 | 56     | 22                  | 32     | 21                | 33    | 38                  | 49      | 37                | 67    | 35                    | 51    | 38                    | 26    | 29    | 49    |
| Post-3rd  | 303                | 5,557  | 123                 | 1,593  | 57                | 82    | 4,295               | 196,648 | 73                | 336   | 83                    | 183   | 107                   | 46    | 99    | 42    |
| Post-6th  | 2,416              | 15,628 | 472                 | 11,140 | 82                | 156   | 101,670             | 254,084 | 252               | 534   | 93                    | 157   | 36                    | 35    | 30    | 25    |
| Pre       | <20                | 41     | <20                 | <20    | <20               | <20   | 21                  | 38      | 22                | 44    | 21                    | 33    | <20                   | <20   | <20   | 30    |
| Post-3rd  | 352                | 3,855  | 587                 | 2,321  | 76                | 104   | 1,986               | 97,502  | 100               | 329   | 126                   | 224   | 91                    | 86    | 115   | 61    |
| Post-6th  | 510                | 7,891  | 5,638               | 7,772  | 167               | 267   | 27,493              | 203,356 | 93                | 329   | 75                    | 166   | 41                    | 48    | 39    | 71    |

| Timepoint | Tier 2C<br>ZM233M.PB6 |       | Tier 2C<br>Du422.1 |       | MuLV  |       |
|-----------|-----------------------|-------|--------------------|-------|-------|-------|
|           | gp120                 | gp140 | gp120              | gp140 | gp120 | gp140 |
| Pre       | 45                    | 21    | 37                 | 25    | 35    | 20    |
| Post-3rd  | 163                   | 59    | 95                 | 45    | 161   | 58    |
| Post-6th  | 47                    | 56    | 22                 | 28    | 35    | 33    |
| Pre       | 52                    | 23    | 45                 | 29    | 47    | 21    |
| Post-3rd  | 129                   | 117   | 90                 | 77    | 139   | 107   |
| Post-6th  | 42                    | 74    | 27                 | 28    | 42    | 30    |
| Pre       | 58                    | <20   | 59                 | <20   | 53    | <20   |
| Post-3rd  | 79                    | 84    | 55                 | 80    | 98    | 90    |
| Post-6th  | 44                    | 43    | 28                 | 22    | 39    | 27    |
| Pre       | 34                    | 50    | 42                 | 58    | 29    | 49    |
| Post-3rd  | 70                    | 42    | 79                 | 38    | 99    | 42    |
| Post-6th  | 49                    | 53    | 28                 | 27    | 30    | 25    |
| Pre       | <20                   | 26    | 22                 | 31    | <20   | 30    |
| Post-3rd  | 107                   | 79    | 103                | 111   | 115   | 61    |
| Post-6th  | 58                    | 76    | 32                 | 33    | 39    | 71    |

## C97ZA012 gp120 & gp140 TZM.bl Titers

| Timepoint | Tier 1A<br>DJ263.8 |        | Tier 1B<br>SF162.LS |        | Tier 1B<br>BaL.26 |       | Tier 1C<br>MW965.26 |         | Tier 1C<br>TV1.21 |       | Tier 1C<br>ZM109F.PB4 |       | Tier 1C<br>ZM197M.PB7 |       | MuLV  |       |
|-----------|--------------------|--------|---------------------|--------|-------------------|-------|---------------------|---------|-------------------|-------|-----------------------|-------|-----------------------|-------|-------|-------|
|           | gp120              | gp140  | gp120               | gp140  | gp120             | gp140 | gp120               | gp140   | gp120             | gp140 | gp120                 | gp140 | gp120                 | gp140 | gp120 | gp140 |
| Pre       | 32                 | 83     | <20                 | <20    | <20               | <20   | 34                  | 35      | 27                | 20    | 22                    | 25    | 20                    | 27    | 20    | 24    |
| Post-3rd  | 514                | 3,743  | 102                 | 2,874  | 25                | 141   | 14,727              | 77,195  | 24                | 369   | 32                    | 147   | <20                   | 23    | 27    | 22    |
| Post-6th  | NT                 | 11,256 | NT                  | 11,040 | NT                | 302   | NT                  | 193,394 | NT                | 907   | NT                    | 141   | NT                    | 35    | NT    | 22    |
| Pre       | 22                 | 37     | <20                 | <20    | <20               | <20   | 23                  | 29      | 20                | 25    | 26                    | 25    | <20                   | <20   | <20   | 25    |
| Post-3rd  | 2,181              | 4,562  | 56                  | 1,873  | 54                | 86    | 123,447             | 178,965 | 119               | 426   | 121                   | 158   | 56                    | 29    | 71    | 42    |
| Post-6th  | 1,390              | 12,118 | 268                 | 10,223 | 145               | 280   |                     | 389,423 | 202               | 878   | 71                    | 244   | 25                    | 34    | 21    | 27    |
| Pre       | 25                 | 41     | <20                 | <20    | <20               | <20   | 27                  | 33      | <20               | 25    | <20                   | 24    | <20                   | 23    | <20   | 21    |
| Post-3rd  | 293                | 3,431  | 118                 | 5,243  | 51                | 225   | 3,478               | 147,353 | 61                | 293   | 70                    | 165   | 56                    | 67    | 78    | 66    |
| Post-6th  | 756                | 7,387  | 102                 | 12,133 | 57                | 433   |                     | 275,335 | 119               | 548   | 50                    | 115   | 22                    | 28    | 25    | 21    |
| Pre       | 28                 | 35     | <20                 | <20    | <20               | <20   | 33                  | 31      | 27                | 29    | 29                    | 29    | 25                    | <20   | 21    | 33    |
| Post-3rd  | 1,089              | 2,922  | 341                 | 2,427  | 50                | 162   | 23,474              | 136,667 | 79                | 378   | 56                    | 285   | 63                    | 133   | 67    | 115   |
| Post-6th  | 2,456              | 20,358 | 5006                | 8,942  | 96                | 263   |                     | 848,672 | 327               | 1,243 | 74                    | 258   | 23                    | 33    | 25    | 27    |
| Pre       | 23                 | 54     | <20                 | 36     | <20               | 21    | 32                  | 38      | <20               | 61    | 21                    | 65    | <20                   | 54    | 25    | 59    |
| Post-3rd  | 611                | 4,846  | 301                 | 1,521  | 41                | 147   | 36,318              | 124,229 | 95                | 681   | 62                    | 308   | 52                    | 156   | 52    | 134   |
| Post-6th  | 496                | 12,037 | 583                 | 24,998 | 112               | 632   | 27,309              | 349,392 | 102               | 987   | 67                    | 182   | 36                    | 40    | 33    | 36    |

| Timepoint | Tier 2C<br>ZM233M.PB6 |       | Tier 2C<br>Du422.1 |       | MuLV  |       |
|-----------|-----------------------|-------|--------------------|-------|-------|-------|
|           | gp120                 | gp140 | gp120              | gp140 | gp120 | gp140 |
| Pre       | <20                   | <20   | <20                | <20   | 20    | 24    |
| Post-3rd  | <20                   | 70    | <20                | <20   | 27    | 22    |
| Post-6th  | NT                    | 60    | NT                 | <20   | NT    | 22    |
| Pre       | <20                   | <20   | <20                | <20   | <20   | 25    |
| Post-3rd  | 71                    | 40    | 50                 | 30    | 71    | 42    |
| Post-6th  | 40                    | 44    | <20                | <20   | 21    | 27    |
| Pre       | <20                   | <20   | <20                | <20   | <20   | 21    |
| Post-3rd  | 73                    | 53    | 55                 | 49    | 78    | 66    |
| Post-6th  | 28                    | 48    | <20                | <20   | 25    | 21    |
| Pre       | <20                   | <20   | <20                | <20   | 21    | 33    |
| Post-3rd  | 68                    | 130   | 46                 | 95    | 67    | 115   |
| Post-6th  | 50                    | 91    | 22                 | 23    | 25    | 27    |
| Pre       | <20                   | 44    | <20                | 54    | 25    | 59    |
| Post-3rd  | 65                    | 222   | 41                 | 166   | 52    | 134   |
| Post-6th  | 58                    | 113   | 30                 | 28    | 33    | 36    |

| Color Code | Titler Range |
|------------|--------------|
|            | 0-99         |
|            | 100-999      |
|            | 1000-9999    |
|            | >10,000      |

Fig. S11. Comparison of gp140 trimer versus gp120 monomer neutralizing antibody titers by the TZM.bl assay. Guinea pig sera obtained prevaccination (Pre), 4 wk after the third vaccination (Post-3rd), and 4 wk after the sixth vaccination (Post-6th) were tested against a multiclade panel of tier 1 neutralization-sensitive isolates including clade A (DJ263.8), clade B (SF162.LS and BaL.26), and clade C (MW965.26, TV1.21, ZM109F, and ZM197M), and two clade C tier 2 neutralization-resistant pseudoviruses (ZM233M.PB6 and ZM197M.PB7) in TZM.bl neutralization assays. Values shown are the serum dilutions representing the ID<sub>50</sub> titers for each animal with titer ranges color-coded as indicated.

## 92UG037.8 gp120 & gp140 A3R5 Titers

| Timepoint | Tier 2 (C)<br>Du422.1 |        | Tier 2 (C)<br>Ce1086_B2 |       | Tier 2 (C)<br>Ce2010_F5 |       |
|-----------|-----------------------|--------|-------------------------|-------|-------------------------|-------|
|           | gp120                 | gp140  | gp120                   | gp140 | gp120                   | gp140 |
| Pre       | 33                    | 53     | 34                      | 35    | 64                      | 65    |
| Post-6th  | 1,244                 | 10,517 | 580                     | 6,860 | 140                     | 384   |
| Pre       | 77                    | 31     | 51                      | <20   | 44                      | <20   |
| Post-6th  | 28,227                | 31,975 | 737                     | 748   | 53                      | 95    |
| Pre       | 131                   | 30     | 44                      | <20   | 61                      | 21    |
| Post-6th  | 15,386                | 25,953 | 192                     | 421   | 117                     | 127   |
| Pre       | 30                    | 44     | <20                     | 29    | 46                      | 98    |
| Post-6th  | 7,436                 | 9,269  | 735                     | 363   | 61                      | 59    |
| Pre       | 26                    | 26     | <20                     | 28    | 48                      | 41    |
| Post-6th  | 3,969                 | 6,526  | 530                     | 380   | 69                      | 84    |

## C97ZA012 gp120 & gp140 A3R5 Titers

| Timepoint | Tier 2 (C)<br>Du422.1 |       | Tier 2 (C)<br>Ce1086_B2 |        | Tier 2 (C)<br>Ce2010_F5 |       |
|-----------|-----------------------|-------|-------------------------|--------|-------------------------|-------|
|           | gp120                 | gp140 | gp120                   | gp140  | gp120                   | gp140 |
| Pre       | NT                    | 36    | NT                      | <20    | NT                      | 39    |
| Post-6th  | NT                    | 1,782 | NT                      | 11,675 | NT                      | 256   |
| Pre       | 24                    | 32    | <20                     | <20    | <20                     | 26    |
| Post-6th  | 1,770                 | 6,200 | 1,185                   | 4,152  | 95                      | 210   |
| Pre       | <20                   | 120   | <20                     | <20    | <20                     | 115   |
| Post-6th  | 933                   | 1,907 | 105                     | 729    | 58                      | 83    |
| Pre       | 69                    | 37    | <20                     | 29     | 57                      | 45    |
| Post-6th  | 437                   | 1,575 | 347                     | 979    | 65                      | 177   |
| Pre       | 40                    | 34    | 28                      | <20    | 29                      | 50    |
| Post-6th  | 433                   | 3,850 | 109                     | 1,924  | 62                      | 572   |

| Color Code | Titer Range |
|------------|-------------|
|            | 0-99        |
|            | 100-999     |
|            | 1000-9999   |
|            | >10,000     |

**Fig. S12.** Comparison of gp140 trimer versus gp120 monomer tier 2 neutralizing antibody titers by the A3R5 assay. Guinea pig sera obtained prevaccination (Pre) and 4 wk after the sixth vaccination (Post-6th) were tested against three tier 2 clade C isolates—Du422, Ce1086\_B2, and Ce2010\_F5 IMC viruses—in A3R5 neutralization assays. Values shown are the serum dilutions representing the ID<sub>50</sub> titers for each animal with titer ranges color-coded as indicated.

**Table S1. Molecular mass determined by analytical ultracentrifugation and multiangle light scattering**

| Protein                            | Molecular mass (kDa) by<br>analytical ultracentrifugation | Molecular mass (kDa)<br>by MALS |
|------------------------------------|-----------------------------------------------------------|---------------------------------|
| 92UG037.8 gp120                    | 130 ± 7                                                   | 126 ± 4                         |
| C97ZA012 gp120                     | 128 ± 6                                                   | 125 ± 6                         |
| 92UG037.8 gp140                    | 413 ± 9                                                   | 419 ± 5                         |
| C97ZA012 gp140                     | 408 ± 6                                                   | 410 ± 4                         |
| 92UG037.8 gp140 + 4D CD4           | 458 ± 4                                                   | 460 ± 5                         |
| C97ZA012 gp140 + 4D CD4            | 454 ± 3                                                   | 454 ± 4                         |
| 92UG037.8 gp140 + VRC01 Fab        | 567 ± 5                                                   | 570 ± 15                        |
| C97ZA012 gp140 + VRC01 Fab         | 563 ± 4                                                   | 570 ± 6                         |
| 92UG037.8 gp140 + 4D CD4 + 17b Fab | 511 ± 2                                                   | 510 ± 10                        |
| C97ZA012 gp140 + 4D CD4 + 17b Fab  | 506 ± 3                                                   | 507 ± 6                         |
| 4D CD4                             | n.d.                                                      | 43 ± 5                          |
| VRC01 Fab                          | n.d.                                                      | 49 ± 7                          |
| 17b Fab                            | n.d.                                                      | 50 ± 6                          |

Detailed data analyses are shown in Figs. S7 and S8. MALS, multiangle light scattering; n.d., not determined.

**Table S2. Binding rate constants derived from surface plasmon resonance analysis**

| Immobilized ligand | Flowing analyte         | $K_a$ (1/Ms)      | $K_d$ (1/s)          | $K_d$ (M)            |
|--------------------|-------------------------|-------------------|----------------------|----------------------|
| VRC01              | 92UG037.8 gp120         | $8.3 \times 10^3$ | $7.9 \times 10^{-4}$ | $9.6 \times 10^{-8}$ |
|                    | 92UG037.8 gp140         | $1.6 \times 10^4$ | $6.4 \times 10^{-5}$ | $3.9 \times 10^{-9}$ |
|                    | C97ZA012 gp120          | $3.2 \times 10^3$ | $6.6 \times 10^{-4}$ | $9.6 \times 10^{-8}$ |
| B6                 | C97ZA012 gp140          | $1.2 \times 10^3$ | $7.6 \times 10^{-5}$ | $2.1 \times 10^{-9}$ |
|                    | 92UG037.8 gp120         | $1.2 \times 10^5$ | $6.1 \times 10^{-3}$ | $5.1 \times 10^{-8}$ |
|                    | 92UG037.8 gp140         | nb                | nb                   | nb                   |
| PG9                | C97ZA012 gp120          | nb                | nb                   | nb                   |
|                    | C97ZA012 gp140          | nb                | nb                   | nb                   |
|                    | 92UG037.8 gp120         | nb                | nb                   | nb                   |
| PG16               | 92UG037.8 gp140         | $1.9 \times 10^4$ | $1.0 \times 10^{-3}$ | $9.3 \times 10^{-8}$ |
|                    | C97ZA012 gp120          | nb                | nb                   | nb                   |
|                    | C97ZA012 gp140          | $1.4 \times 10^4$ | $2.5 \times 10^{-3}$ | $3.1 \times 10^{-7}$ |
| PGT123             | 92UG037.8 gp120         | nb                | nb                   | nb                   |
|                    | 92UG037.8 gp140         | $2.4 \times 10^4$ | $1.8 \times 10^{-3}$ | $4.3 \times 10^{-8}$ |
|                    | C97ZA012 gp120          | nb                | nb                   | nb                   |
| 2G12               | C97ZA012 gp140          | $1.6 \times 10^4$ | $4.2 \times 10^{-3}$ | $1.1 \times 10^{-7}$ |
|                    | 92UG037.8 gp120         | $3.6 \times 10^3$ | $4.9 \times 10^{-4}$ | $1.4 \times 10^{-7}$ |
|                    | 92UG037.8 gp140         | $2.9 \times 10^3$ | $7.9 \times 10^{-5}$ | $2.7 \times 10^{-8}$ |
| 4E10               | C97ZA012 gp120          | $4.3 \times 10^3$ | $1.1 \times 10^{-3}$ | $2.6 \times 10^{-7}$ |
|                    | C97ZA012 gp140          | $6.1 \times 10^3$ | $2.7 \times 10^{-4}$ | $4.3 \times 10^{-8}$ |
|                    | 92UG037.8 gp120         | $3.6 \times 10^4$ | $3.6 \times 10^{-3}$ | $9.9 \times 10^{-8}$ |
| 2F5                | 92UG037.8 gp140         | $8.4 \times 10^3$ | $6.0 \times 10^{-3}$ | $7.1 \times 10^{-7}$ |
|                    | C97ZA012 gp120          | nb                | nb                   | nb                   |
|                    | C97ZA012 gp140          | nb                | nb                   | nb                   |
| CD4                | 92UG037.8 gp120         | nb                | nb                   | nb                   |
|                    | 92UG037.8 gp140         | nb                | nb                   | nb                   |
|                    | C97ZA012 gp120          | nb                | nb                   | nb                   |
| 17b                | C97ZA012 gp140          | nb                | nb                   | nb                   |
|                    | 92UG037.8 gp120         | nb                | nb                   | nb                   |
|                    | 92UG037.8 gp140         | nb                | nb                   | nb                   |
| 17b                | C97ZA012 gp120          | nb                | nb                   | nb                   |
|                    | C97ZA012 gp140          | nb                | nb                   | nb                   |
|                    | 92UG037.8 gp120         | nb                | nb                   | nb                   |
| 17b                | 92UG037.8 gp140         | nb                | nb                   | nb                   |
|                    | C97ZA012 gp120          | nb                | nb                   | nb                   |
|                    | C97ZA012 gp140          | nb                | nb                   | nb                   |
| 17b                | 92UG037.8 gp120 + CD4   | $2.1 \times 10^4$ | $1.1 \times 10^{-4}$ | $9.5 \times 10^{-9}$ |
|                    | 92UG037.8 gp140 + CD4   | $2.1 \times 10^4$ | $4.4 \times 10^{-4}$ | $2.1 \times 10^{-8}$ |
|                    | C97ZA012 gp120 + CD4    | $1.4 \times 10^4$ | $1.0 \times 10^{-4}$ | $7.5 \times 10^{-9}$ |
| 17b                | C97ZA012 gp140 + CD4    | $2.5 \times 10^4$ | $4.8 \times 10^{-4}$ | $1.1 \times 10^{-8}$ |
|                    | 92UG037.8 gp120         | $6.5 \times 10^3$ | $1.9 \times 10^{-4}$ | $3.9 \times 10^{-8}$ |
|                    | 92UG037.8 gp140         | nb                | nb                   | nb                   |
| 17b                | C97ZA012 gp120          | $8.5 \times 10^3$ | $2.2 \times 10^{-4}$ | $2.6 \times 10^{-8}$ |
|                    | C97ZA012 gp140          | nb                | nb                   | nb                   |
|                    | 92UG037.8 gp120 + VRC01 | $2.1 \times 10^4$ | $6.7 \times 10^{-5}$ | $3.2 \times 10^{-9}$ |
| 17b                | 92UG037.8 gp140 + VRC01 | $1.0 \times 10^4$ | $3.1 \times 10^{-5}$ | $6.0 \times 10^{-9}$ |
|                    | C97ZA012 gp120 + VRC01  | $9.2 \times 10^3$ | $5.8 \times 10^{-5}$ | $4.3 \times 10^{-9}$ |
|                    | C97ZA012 gp140 + VRC01  | $1.0 \times 10^4$ | $3.9 \times 10^{-5}$ | $5.8 \times 10^{-9}$ |
| CH31               | 92UG037.8 gp120         | $8.6 \times 10^3$ | $7.8 \times 10^{-5}$ | $9.1 \times 10^{-9}$ |
|                    | 92UG037.8 gp140         | nb                | nb                   | nb                   |
|                    | C97ZA012 gp120          | $8.4 \times 10^3$ | $7.9 \times 10^{-5}$ | $9.3 \times 10^{-9}$ |
| CH31               | C97ZA012 gp140          | nb                | nb                   | nb                   |
|                    | 92UG037.8 gp120         | $2.8 \times 10^3$ | $8.7 \times 10^{-4}$ | $3.2 \times 10^{-7}$ |
|                    | 92UG037.8 gp140         | $8.9 \times 10^3$ | $4.0 \times 10^{-5}$ | $4.5 \times 10^{-9}$ |
| CH31               | C97ZA012 gp120          | $1.3 \times 10^2$ | $5.9 \times 10^{-4}$ | $4.5 \times 10^{-6}$ |
|                    | C97ZA012 gp140          | $9.7 \times 10^3$ | $1.3 \times 10^{-4}$ | $1.3 \times 10^{-8}$ |

nb, no binding.

**Table S3. Neutralization of HIV-1 isolates C97ZA012 and 92UG037 by broadly neutralizing antibodies in TZM.bl cells**

| Isolate   | Antibodies               |                          |                          |                          |                          |                          |                          |                          |                          |                          |
|-----------|--------------------------|--------------------------|--------------------------|--------------------------|--------------------------|--------------------------|--------------------------|--------------------------|--------------------------|--------------------------|
|           | PG9                      |                          | PG16                     |                          | CH31                     |                          | 2F5                      |                          | 4E10                     |                          |
|           | IC <sub>50</sub> (μg/mL) | IC <sub>80</sub> (μg/mL) |
| C97ZA012  | 8.20                     | >25                      | 2.90                     | >25                      | 0.18                     | 0.47                     | >50                      | >50                      | 20.8                     | >50                      |
| 92UG037.8 | 0.04                     | 0.17                     | <0.01                    | 0.03                     | 0.04                     | 0.08                     | 0.97                     | 4.40                     | 2.11                     | 7.70                     |
